# Supplementary material
Source: PubMed Central journal article supplement (PMC3000312)
Supplement: 1013512107_pnas.201013512SI.pdf [file 1013512107_pnas.201013512SI.pdf]

# Supporting Information

Nord et al. 10.1073/pnas.1013512107

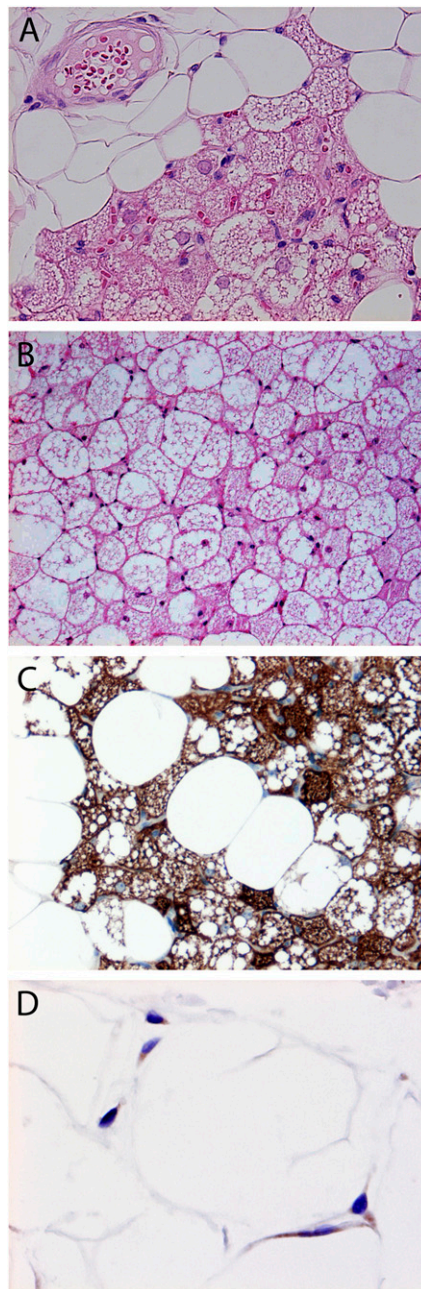

**Fig. S1.** Characteristics of normal and neoplastic adipose tissues. (A) Brown and white adipocytes are intermingled in normal brown fat from the parietal pleura of a healthy 18-y-old man. Whereas the white adipocytes have a single, large vacuole and a peripherally located nucleus, the brown adipocytes display a multivacuolated cytoplasm and a centrally located nucleus. (B) These features are very similar to the morphological characteristics of hibernoma. (C) UCP1 is highly expressed in multivacuolated cells of hibernomas, whereas univacuolated cells of hibernomas and (D) lipomas are only weakly positive or negative for UCP1.







Table S2. DNA copy number aberrations detected by SNP array analysis

| Case | Chromosome band | Base pair position, Mb* | Aberration          | Comment <sup>†</sup>  |
|------|-----------------|-------------------------|---------------------|-----------------------|
| 1    | 11q13           | 64,239–64,336           | Deletion            | <i>MEN1</i>           |
| 1    | 11q13           | 64,341–64,512           | Homozygous deletion |                       |
| 1    | 11q13           | 64,512–65,035           | Deletion            |                       |
| 1    | 11q13           | 65,546–65,679           | Deletion            |                       |
| 1    | 11q13           | 66,964–67,023           | Deletion            | <i>AIP</i>            |
| 1    | 11q13           | 67,025–67,068           | Homozygous deletion |                       |
| 1    | 11q13           | 67,069–67,109           | Deletion            |                       |
| 1    | 17q11-21        | 24,936–40,604           | Deletion            |                       |
| 2    |                 |                         |                     | No aberration         |
| 3    | 6p21            | 34,324–34,648           | Deletion            | Bp in 6p21            |
| 3    | 8p12-p22        | 16,116–33,183           | Deletion            |                       |
| 3    | 8p11-p12        | 36,765–38,738           | Deletion            |                       |
| 3    | 11q13           | 64,222–64,314           | Deletion            |                       |
| 3    | 11q13           | 64,316–64,363           | Homozygous deletion | <i>MEN1</i>           |
| 3    | 11q13           | 64,367–64,485           | Deletion            |                       |
| 3    | 14q11-12        | 23,830–26,464           | Deletion            | Bp in 14q11           |
| 3    | 14q12           | 26,857–26,930           | Deletion            |                       |
| 4    | 11p15           | 20,047–20,076           | Deletion            | Bp in 11p15           |
| 4    | 11q12           | 60,999–61,277           | Deletion            |                       |
| 4    | 11q13           | 64,236–64,318           | Deletion            |                       |
| 4    | 11q13           | 64,320–64,505           | Homozygous deletion | <i>MEN1</i>           |
| 4    | 11q13           | 64,510–64,936           | Deletion            |                       |
| 4    | 11q13           | 65,550–65,880           | Deletion            |                       |
| 4    | 11q13           | 66,457–66,997           | Deletion            |                       |
| 4    | 11q13           | 67,003–67,111           | Homozygous deletion | <i>AIP</i>            |
| 4    | 11q13           | 67,111–68,225           | Deletion            |                       |
| 4    | 11q13           | 71,170–72,008           | Deletion            |                       |
| 4    | 11q23           | 112,909–113,228         | Deletion            |                       |
| 4    | 11q24           | 121,589–121,824         | Deletion            |                       |
| 4    | 12p13           | 0,515–0,923             | Deletion            |                       |
| 4    | 12p13           | 1,983–2,292             | Deletion            |                       |
| 4    | 12p13           | 3,660–3,825             | Deletion            |                       |
| 4    | 12p13           | 8,584–8,742             | Deletion            |                       |
| 4    | 12p12           | 23,682–23,862           | Deletion            | Bp in 12p12           |
| 5    | 11q13           | 64,297–64,314           | Deletion            |                       |
| 5    | 11q13           | 64,316–64,377           | Homozygous deletion | <i>MEN1</i>           |
| 5    | 11q13           | 64,377–64,521           | Deletion            |                       |
| 5    | 11q13           | 66,827–67,106           | Deletion            | <i>AIP</i>            |
| 5    | 11q13           | 67,505–67,635           | Deletion            |                       |
| 6    | 5q11            | 55,308–55,909           | Deletion            | Bp in 5q11            |
| 6    | 11p11           | 45,507–45,647           | Deletion            | Bp in 11p11           |
| 6    | 11q13           | 63,465–63,714           | Deletion            |                       |
| 6    | 11q13           | 64,015–64,471           | Deletion            | <i>MEN1</i>           |
| 6    | 11q13           | 67,013–67,148           | Deletion            | <i>AIP</i> exons 3–6  |
| 6    | 11q13           | 67,897–68,074           | Deletion            |                       |
| 7    | 11q13           | 61,918–62,100           | Deletion            |                       |
| 7    | 11q13           | 64,308–64,329           | Deletion            |                       |
| 7    | 11q13           | 64,330–64,465           | Homozygous deletion | <i>MEN1</i> exons 1–7 |
| 7    | 11q13           | 64,466–64,897           | Deletion            |                       |
| 7    | 11q13           | 66,827–67,006           | Deletion            |                       |
| 7    | 11q13           | 67,007–67,097           | Homozygous deletion | <i>AIP</i>            |
| 7    | 14q11           | 24,417–24,558           | Deletion            | Bp in 14q11           |
| 7    | 16p11           | 29,814–29,915           | Deletion            | Bp in 16p11           |
| 8    | 11q13           | 64,314–64,465           | Deletion            | <i>MEN1</i>           |
| 8    | 11q13           | 66,928–67,097           | Deletion            | <i>AIP</i>            |
| 9    | 4q28-31         | 131,320–140,332         | Deletion            |                       |
| 9    | 11q13           | 63,521–64,516           | Deletion            | <i>MEN1</i>           |
| 9    | 11q13           | 66,922–67,157           | Deletion            | <i>AIP</i>            |
| 9    | 11q13           | 71,392–71,628           | Deletion            |                       |
| 10   | 11q13           | 63,901–64,310           | Deletion            |                       |
| 10   | 11q13           | 64,312–64,431           | Homozygous deletion | <i>MEN1</i>           |
| 10   | 11q13           | 64,432–64,471           | Deletion            |                       |
| 10   | 11q13           | 65,035–65,185           | Deletion            |                       |

Table S2. Cont.

| Case | Chromosome band              | Base pair position, Mb* | Aberration          | Comment <sup>†</sup> |
|------|------------------------------|-------------------------|---------------------|----------------------|
| 10   | 11q13                        | 66,034–66,225           | Deletion            |                      |
| 10   | 11q13                        | 66,933–67,104           | Deletion            | <i>AIP</i>           |
| 10   | 11q13                        | 67,653–68,285           | Deletion            |                      |
| 11   | 5p14                         | 26,587–26,773           | Gain                |                      |
| 11   | 7q21                         | 81,686–81,853           | Deletion            |                      |
| 11   | 7q31                         | 116,515–116,742         | Deletion            |                      |
| 11   | 11q13                        | 64,308–64,483           | Homozygous deletion | <i>MEN1</i>          |
| 11   | 11q13                        | 64,484–67,199           | Deletion            | <i>AIP</i>           |
| 12   | 4q35                         | 185,802–185,858         | Deletion            |                      |
| 12   | 11q13                        | 64,228–64,413           | Deletion            | <i>MEN1</i>          |
| 12   | 11q13                        | 65,560–65,584           | Deletion            |                      |
| 12   | 11q13                        | 65,713–66,105           | Deletion            |                      |
| 12   | 11q13                        | 66,372–66,590           | Deletion            |                      |
| 12   | 11q13                        | 66,922–66,956           | Deletion            |                      |
| 12   | 11q13                        | 66,956–66,982           | Homozygous deletion |                      |
| 12   | 11q13                        | 66,982–67,068           | Deletion            | <i>AIP</i>           |
| 13   | 6q23-26                      | 134,529–164,298         | Deletion            |                      |
| 13   | 11q13                        | 63,031–71,227           | Deletion            | <i>MEN1, AIP</i>     |
| 14   | 11q13                        | 64,260–64,318           | Deletion            |                      |
| 14   | 11q13                        | 64,320–64,494           | Homozygous deletion | <i>MEN1</i>          |
| 14   | 11q13                        | 64,495–64,569           | Deletion            |                      |
| 14   | 11q13                        | 65,106–65,232           | Deletion            |                      |
| 14   | 11q13                        | 65,722–65,840           | Deletion            |                      |
| 14   | 11q13                        | 66,120–66,347           | Deletion            |                      |
| 14   | 11q13                        | 66,928–67,025           | Homozygous deletion | <i>AIP</i>           |
| 14   | 11q13                        | 67,031–67,097           | Deletion            |                      |
| 14   | 12q13                        | 48,445–48,733           | Deletion            |                      |
| 15   | 6q12-q16                     | 66,979–97,751           | Deletion            |                      |
| 15   | 11p15                        | 0,061–3,063             | Deletion            |                      |
| 15   | 11p15                        | 10,372–11,017           | Deletion            |                      |
| 15   | 11p15                        | 11,928–12,165           | Deletion            |                      |
| 15   | 11p15                        | 12,522–13,089           | Deletion            |                      |
| 15   | 11p11-q13                    | 50,950–63,728           | Deletion            |                      |
| 15   | 11q13                        | 63,730–63,783           | Homozygous deletion |                      |
| 15   | 11q13                        | 63,791–64,013           | Deletion            |                      |
| 15   | 11q13                        | 64,316–64,570           | Homozygous deletion | <i>MEN1</i>          |
| 15   | 11q13                        | 65,220–65,718           | Deletion            |                      |
| 15   | 11q13                        | 66,926–67,710           | Deletion            | <i>AIP</i>           |
| 15   | 11q23-q25                    | 117,156–134,444         | Deletion            | Bp in 11q23          |
|      | Normal blood DNA from case 1 |                         |                     | No aberration        |
|      | Normal blood DNA from case 2 |                         |                     | No aberration        |
|      | Normal blood DNA from case 4 |                         |                     | No aberration        |
|      | Normal blood DNA from case 6 |                         |                     | No aberration        |

\*Base pair positions are indicated according to the NCBI build 36 (hg18).

<sup>†</sup>Deletions in chromosome bands involved in translocations, inversions, or insertions are noted as potential breakpoints (Bp) for the rearrangements.

**Table S3. Primer sequences**

| Designation | Sequence (5'-3')          | Position  | Gene (accession no.)   |
|-------------|---------------------------|-----------|------------------------|
| MEN1-1752F  | TTGCCTGCAGGCCGCCGCC       | 1752–1771 | MEN1 (ENSG00000133895) |
| MEN1-2091R  | CTCGAGGATAGAGGGACAGG      | 2091–2110 | MEN1 (ENSG00000133895) |
| MEN1-1909F  | GGCTTCGTGGAGCATTTTCT      | 1909–1928 | MEN1 (ENSG00000133895) |
| MEN1-2239R  | CATGGATAAGATTCCACCTACTGG  | 2239–2263 | MEN1 (ENSG00000133895) |
| MEN1-3758F  | CACAGAGGACCTCTTTCATTAC    | 3758–3780 | MEN1 (ENSG00000133895) |
| MEN1-3936R  | CTTGCCGTGCCAGGTGAC        | 3936–3953 | MEN1 (ENSG00000133895) |
| MEN1-3873F  | CTCGCCTGTCTGAGGATCATG     | 3873–3894 | MEN1 (ENSG00000133895) |
| MEN1-4041R  | TGGGTGGCTTGGGCTACTACAG    | 4041–4062 | MEN1 (ENSG00000133895) |
| MEN1-4176F  | GGGCATCATGAGACATAATG      | 4176–4196 | MEN1 (ENSG00000133895) |
| MEN1-4351R  | CTGCCCCATTGGCTCAG         | 4351–4367 | MEN1 (ENSG00000133895) |
| MEN1-4637F  | CCTGTTCCGTGGCTCATAACTC    | 4637–4658 | MEN1 (ENSG00000133895) |
| MEN1-4913R  | CTCAGCCACTGTTAGGGTCTCC    | 4913–4934 | MEN1 (ENSG00000133895) |
| MEN1-5487F  | GGCTGCCTCCCTGAGGATC       | 5487–5505 | MEN1 (ENSG00000133895) |
| MEN1-5720R  | CTGGACGAGGGTGGTTGG        | 5720–5737 | MEN1 (ENSG00000133895) |
| MEN1-6081F  | GTGAGACCCCTCAGACCCTAC     | 6081–6102 | MEN1 (ENSG00000133895) |
| MEN1-6281R  | TGGGAGGCTGGACACAGG        | 6281–6298 | MEN1 (ENSG00000133895) |
| MEN1-6651F  | GGGTGAGTAAGAGACTGATCTGTGC | 6651–6675 | MEN1 (ENSG00000133895) |
| MEN1-6876R  | TGTAGTGCCCAGACCTCTGTG     | 6876–6896 | MEN1 (ENSG00000133895) |
| MEN1-7053F  | TCACCTTGCTCCTCCACTG       | 7053–7072 | MEN1 (ENSG00000133895) |
| MEN1-7375R  | CACTCTGGAAGTGAGCACT       | 7375–7394 | MEN1 (ENSG00000133895) |
| MEN1-7212F  | CCAAGAAGCCAGCACTGGAC      | 7212–7231 | MEN1 (ENSG00000133895) |
| MEN1-7570R  | CCCCACAAGCGGTCCGAAGTCC    | 7570–7591 | MEN1 (ENSG00000133895) |
| AIP-ex1F    | CCGAGACATTCTAGGCTCC       | 504–523   | AIP (ENSG00000110711)  |
| AIP-ex1R    | CTCTCGCTAAGGCCTCC         | 883–900   | AIP (ENSG00000110711)  |
| AIP-ex2F    | GGACTGGACTTCTCCTGGG       | 4503–4522 | AIP (ENSG00000110711)  |
| AIP-ex2R    | GTCTAGCAGAGGGTGGAGGG      | 4829–4848 | AIP (ENSG00000110711)  |
| AIP-ex3F    | GATGGTGGTGGGGAAGG         | 6743–6759 | AIP (ENSG00000110711)  |
| AIP-ex3R    | ACCCCTGGGTGGACAGG         | 7085–7101 | AIP (ENSG00000110711)  |
| AIP-ex4-5F  | ATGTGGGTGAGTCTGCTG        | 7527–7545 | AIP (ENSG00000110711)  |
| AIP-ex4-5R  | AAAGGCTAGGTCTTGACCCC      | 8094–8113 | AIP (ENSG00000110711)  |
| AIP-ex6F    | AGGAGACATGAGGGCAGGC       | 8275–8293 | AIP (ENSG00000110711)  |
| AIP-ex6R    | AACAGCCACCCAAGTACCAG      | 8724–8743 | AIP (ENSG00000110711)  |

**Table S4. TBP gene expression levels**

| Sample    | TBP* |
|-----------|------|
| Hibernoma | 8.30 |
| Hibernoma | 8.32 |
| Hibernoma | 8.14 |
| Hibernoma | 8.41 |
| Hibernoma | 8.47 |
| Hibernoma | 8.43 |
| Hibernoma | 8.23 |
| Hibernoma | 8.14 |
| Hibernoma | 8.26 |
| Hibernoma | 8.41 |
| Hibernoma | 8.31 |
| Hibernoma | 8.44 |
| Hibernoma | 8.54 |
| Lipoma    | 8.40 |
| Lipoma    | 8.09 |
| Lipoma    | 8.18 |
| Lipoma    | 8.37 |
| Lipoma    | 7.93 |
| Lipoma    | 8.17 |
| WAT       | 8.40 |
| WAT       | 8.12 |
| WAT       | 8.28 |
| SM        | 8.21 |
| SM        | 8.37 |

\*RMA normalized log<sub>2</sub> expression level.
